# Supplementary material
Source: PubMed Central journal article supplement (PMC2885285)
Supplement: NIHMS191633-supplement-Suppl__Fig__3.pdf [file NIHMS191633-supplement-Suppl__Fig__3.pdf]

**WT**

| Genes   | v200       |            |            |            | v3000      |            |            |            |
|---------|------------|------------|------------|------------|------------|------------|------------|------------|
|         | v200       | v1000      | v2000      | poly IC    | v200       | v1000      | v3000      | poly IC    |
| Adfr    | 1.248494   | 1.257401   | 1.257401   | 1.257401   | 1.248494   | 1.257401   | 1.257401   | 1.257401   |
| Csf2    | 1.6901892  | 1.3389759  | 2.4598806  | 8.24312478 | 1.6901892  | 1.3389759  | 2.4598806  | 8.24312478 |
| Csf2l1  | 0.88227858 | 0.32367016 | 1.14743439 | 0.52070731 | 0.88227858 | 0.32367016 | 1.14743439 | 0.52070731 |
| Csf3    | 0.51503564 | 0.63711639 | 1.33628683 | 0.80976059 | 0.51503564 | 0.63711639 | 1.33628683 | 0.80976059 |
| Csf3r   | 1.69051892 | 1.45289496 | 1.89618624 | 1.95412307 | 1.69051892 | 1.45289496 | 1.89618624 | 1.95412307 |
| Csf3r2  | 0.54520497 | 0.826209   | 1.2107329  | 0.76410475 | 0.54520497 | 0.826209   | 1.2107329  | 0.76410475 |
| Cxcl10  | 14.3714644 | 54.9341127 | 63.010264  | 451.406093 | 14.3714644 | 54.9341127 | 63.010264  | 451.406093 |
| Ebf3    | 1.54945641 | 0.61843592 | 0.5483111  | 1.74302629 | 1.54945641 | 0.61843592 | 0.5483111  | 1.74302629 |
| Epor    | 0.75718628 | 1.0951292  | 0.79419597 | 1.22296454 | 0.75718628 | 1.0951292  | 0.79419597 | 1.22296454 |
| F3      | 0.67668415 | 1.0974725  | 1.07687864 | 1.28894537 | 0.67668415 | 1.0974725  | 1.07687864 | 1.28894537 |
| Igfb1   | 4.31562449 | 14.1360819 | 13.5055236 | 61.8971609 | 4.31562449 | 14.1360819 | 13.5055236 | 61.8971609 |
| Igf1    | 0.90012536 | 0.94910881 | 1.1284869  | 1.05297219 | 0.90012536 | 0.94910881 | 1.1284869  | 1.05297219 |
| Igf2    | 1.6901892  | 1.45289496 | 1.89618624 | 1.95412307 | 1.6901892  | 1.45289496 | 1.89618624 | 1.95412307 |
| Igf2r   | 1.61814307 | 3.24418569 | 4.7012133  | 15.5007912 | 1.61814307 | 3.24418569 | 4.7012133  | 15.5007912 |
| Il27    | 0.94388445 | 1.18825412 | 0.98392801 | 0.91632377 | 0.94388445 | 1.18825412 | 0.98392801 | 0.91632377 |
| Il27r   | 1.14029689 | 2.46343888 | 3.3789893  | 13.1461854 | 1.14029689 | 2.46343888 | 3.3789893  | 13.1461854 |
| Il35    | 1.0116226  | 1.52062182 | 1.23650037 | 2.91374845 | 1.0116226  | 1.52062182 | 1.23650037 | 2.91374845 |
| Il4     | 2.47722029 | 2.3465716  | 8.54173812 | 43.1888601 | 2.47722029 | 2.3465716  | 8.54173812 | 43.1888601 |
| Il6     | 0.7840701  | 2.26536143 | 2.36207938 | 16.1538044 | 0.7840701  | 2.26536143 | 2.36207938 | 16.1538044 |
| Il6r1   | 24.9764437 | 95.5232427 | 109.349762 | 576.857567 | 24.9764437 | 95.5232427 | 109.349762 | 576.857567 |
| Il6r2   | 1.14029689 | 2.46343888 | 3.3789893  | 13.1461854 | 1.14029689 | 2.46343888 | 3.3789893  | 13.1461854 |
| Il6r3   | 4.72713205 | 17.9496325 | 24.1595159 | 130.347882 | 4.72713205 | 17.9496325 | 24.1595159 | 130.347882 |
| Il6r4   | 0.54728005 | 0.80929275 | 1.16635356 | 1.12465846 | 0.54728005 | 0.80929275 | 1.16635356 | 1.12465846 |
| Il6r2r  | 0.13646758 | 0.25966053 | 0.26508169 | 0.23437926 | 0.13646758 | 0.25966053 | 0.26508169 | 0.23437926 |
| Il6r1r  | 1.69051892 | 1.45289496 | 1.89618624 | 1.95412307 | 1.69051892 | 1.45289496 | 1.89618624 | 1.95412307 |
| Il6r2r2 | 0.40099652 | 1.0564422  | 1.1157437  | 38.1311023 | 0.40099652 | 1.0564422  | 1.1157437  | 38.1311023 |
| Il6r4r  | 4.89520572 | 0.75294486 | 0.72899415 | 76.3924882 | 4.89520572 | 0.75294486 | 0.72899415 | 76.3924882 |
| Il6r7   | 12.1339728 | 16.2186339 | 28.0421618 | 6.0532746  | 12.1339728 | 16.2186339 | 28.0421618 | 6.0532746  |
| Il6r9   | 1.69051892 | 1.45289496 | 1.89618624 | 1.95412307 | 1.69051892 | 1.45289496 | 1.89618624 | 1.95412307 |
| Il6r1r1 | 1.41978651 | 1.34849147 | 1.4537566  | 1.10467576 | 1.41978651 | 1.34849147 | 1.4537566  | 1.10467576 |
| Il6r2r1 | 1.2294497  | 0.94143631 | 1.09504235 | 1.04918591 | 1.2294497  | 0.94143631 | 1.09504235 | 1.04918591 |
| Il6r1r2 | 21.3329353 | 1.211842   | 1.1577075  | 567.396625 | 21.3329353 | 1.211842   | 1.1577075  | 567.396625 |
| Il6g    | 1.69051892 | 1.45289496 | 1.89618624 | 1.95412307 | 1.69051892 | 1.45289496 | 1.89618624 | 1.95412307 |
| Il6g2   | 0.49431897 | 1.2294497  | 1.0478438  | 1.0897923  | 0.49431897 | 1.2294497  | 1.0478438  | 1.0897923  |
| Il6g3   | 0.84711525 | 0.91786597 | 1.0196786  | 0.9383328  | 0.84711525 | 0.91786597 | 1.0196786  | 0.9383328  |
| Il6k    | 1.07999166 | 1.06756758 | 1.2113826  | 1.24839573 | 1.07999166 | 1.06756758 | 1.2113826  | 1.24839573 |
| Il6c    | 1.36432388 | 1.96627403 | 1.2584225  | 1.97954437 | 1.36432388 | 1.96627403 | 1.2584225  | 1.97954437 |
| Il10rb  | 1.22550058 | 1.16317035 | 1.07870148 | 1.01476117 | 1.22550058 | 1.16317035 | 1.07870148 | 1.01476117 |
| Il11ra1 | 0.7939015  | 1.0361347  | 1.06995054 | 1.01375722 | 0.7939015  | 1.0361347  | 1.06995054 | 1.01375722 |
| Il12b   | 0.92495119 | 1.29642559 | 0.80452396 | 1.47173171 | 0.92495119 | 1.29642559 | 0.80452396 | 1.47173171 |
| Il12r1  | 0.49431897 | 1.01566449 | 0.44629937 | 0.5527892  | 0.49431897 | 1.01566449 | 0.44629937 | 0.5527892  |
| Il12r2  | 1.69051892 | 1.45289496 | 1.89618624 | 1.95412307 | 1.69051892 | 1.45289496 | 1.89618624 | 1.95412307 |
| Il13    | 0.99928019 | 0.72163359 | 0.7224536  | 1.6732364  | 0.99928019 | 0.72163359 | 0.7224536  | 1.6732364  |
| Il13r1  | 0.43827934 | 0.68845716 | 0.6577854  | 0.74817846 | 0.43827934 | 0.68845716 | 0.6577854  | 0.74817846 |
| Il13r2  | 0.52481939 | 0.80629263 | 1.54931089 | 1.17614088 | 0.52481939 | 0.80629263 | 1.54931089 | 1.17614088 |
| Il15    | 1.08586839 | 1.06331821 | 1.58378871 | 3.9203931  | 1.08586839 | 1.06331821 | 1.58378871 | 3.9203931  |
| Il20a   | 0.66741183 | 1.01373284 | 1.18827804 | 1.37888067 | 0.66741183 | 1.01373284 | 1.18827804 | 1.37888067 |
| Il21    | 1.69051892 | 2.31539029 | 1.89618624 | 1.95412307 | 1.69051892 | 2.31539029 | 1.89618624 | 1.95412307 |
| Il21r   | 5.83551979 | 0.92272996 | 1.20426314 | 41.7012098 | 5.83551979 | 0.92272996 | 1.20426314 | 41.7012098 |
| Il22a2  | 1.69051892 | 1.45289496 | 1.89618624 | 1.95412307 | 1.69051892 | 1.45289496 | 1.89618624 | 1.95412307 |
| Il28a   | 0.27955295 | 0.26561118 | 1.11854526 | 3.53774812 | 0.27955295 | 0.26561118 | 1.11854526 | 3.53774812 |
| Il28b   | 0.32204375 | 1.27161564 | 1.8964888  | 1.56375916 | 0.32204375 | 1.27161564 | 1.8964888  | 1.56375916 |
| Il29    | 1.15130746 | 1.0270004  | 1.24808981 | 1.14951434 | 1.15130746 | 1.0270004  | 1.24808981 | 1.14951434 |
| Il3ra   | 1.69506449 | 1.35718783 | 1.22872323 | 1.40825475 | 1.69506449 | 1.35718783 | 1.22872323 | 1.40825475 |
| Il4     | 1.69051892 | 1.45289496 | 1.89618624 | 1.95412307 | 1.69051892 | 1.45289496 | 1.89618624 | 1.95412307 |
| Il4r    | 1.45778319 | 1.20161889 | 1.21265458 | 1.46986576 | 1.45778319 | 1.20161889 | 1.21265458 | 1.46986576 |
| Il6     | 0.88836359 | 1.19846884 | 1.24276868 | 2.4327184  | 0.88836359 | 1.19846884 | 1.24276868 | 2.4327184  |
| Il6a    | 1.14711988 | 1.15161648 | 1.2183847  | 1.27137239 | 1.14711988 | 1.15161648 | 1.2183847  | 1.27137239 |
| Il6e    | 1.18928889 | 2.08867673 | 1.19788429 | 1.21597537 | 1.18928889 | 2.08867673 | 1.19788429 | 1.21597537 |
| Il7     | 0.24837377 | 0.47310252 | 0.5388855  | 0.4150117  | 0.24837377 | 0.47310252 | 0.5388855  | 0.4150117  |
| Il7r    | 0.53916104 | 0.46337509 | 0.60474499 | 1.75166608 | 0.53916104 | 0.46337509 | 0.60474499 | 1.75166608 |
| Il9     | 1.69051892 | 1.45289496 | 1.89618624 | 1.95412307 | 1.69051892 | 1.45289496 | 1.89618624 | 1.95412307 |
| Il9r    | 2.81493106 | 1.41468064 | 1.8462759  | 1.90273722 | 2.81493106 | 1.41468064 | 1.8462759  | 1.90273722 |
| Ilf1    | 0.9754509  | 1.42136827 | 1.6452576  | 1.5661679  | 0.9754509  | 1.42136827 | 1.6452576  | 1.5661679  |
| Ilf2    | 1.19079178 | 1.19492859 | 1.3330702  | 1.5489808  | 1.19079178 | 1.19492859 | 1.3330702  | 1.5489808  |
| Ilf2bp1 | 1.16057131 | 1.21541517 | 1.20503802 | 1.1602907  | 1.16057131 | 1.21541517 | 1.20503802 | 1.1602907  |
| Ilf2bp2 | 1.02539551 | 1.06979725 | 1.26554575 | 1.14431507 | 1.02539551 | 1.06979725 | 1.26554575 | 1.14431507 |
| Ilf3    | 1.73543841 | 1.18133021 | 1.5191387  | 1.29008253 | 1.73543841 | 1.18133021 | 1.5191387  | 1.29008253 |
| Ilf4    | 1.69051892 | 1.45289496 | 1.89618624 | 1.95412307 | 1.69051892 | 1.45289496 | 1.89618624 | 1.95412307 |
| Ilf5    | 0.99893939 | 0.78061084 | 0.7237672  | 1.3183879  | 0.99893939 | 0.78061084 | 0.7237672  | 1.3183879  |
| Ilf6    | 0.37623184 | 0.8920733  | 1.46823378 | 0.90098459 | 0.37623184 | 0.8920733  | 1.46823378 | 0.90098459 |
| Ilf7    | 2.435689   | 6.257278   | 3.7675582  | 26.3483065 | 2.435689   | 6.257278   | 3.7675582  | 26.3483065 |
| Ilf8    | 1.69051892 | 1.45289496 | 1.89618624 | 1.95412307 | 1.69051892 | 1.45289496 | 1.89618624 | 1.95412307 |
| Irfm    | 1.26650183 | 2.31898004 | 2.3722578  | 6.80323693 | 1.26650183 | 2.31898004 | 2.3722578  | 6.80323693 |
| Irfp    | 0.50790697 | 1.88883123 | 2.50366349 | 1.37934983 | 0.50790697 | 1.88883123 | 2.50366349 | 1.37934983 |
| Irf     | 1.54509231 | 1.98262001 | 1.1797893  | 1.40723116 | 1.54509231 | 1.98262001 | 1.1797893  | 1.40723116 |
| Irf1    | 0.10767519 | 1.31032392 | 1.46868118 | 1.48599199 | 0.10767519 | 1.31032392 | 1.46868118 | 1.48599199 |
| Irf2    | 0.43510517 | 2.25418039 | 2.3683164  | 1.70294204 | 0.43510517 | 2.25418039 | 2.3683164  | 1.70294204 |
| Mx1     | 1.19453313 | 36.1267207 | 65.565346  | 422.953231 | 1.19453313 | 36.1267207 | 65.565346  | 422.953231 |
| Oas1a   | 2.12725674 | 0.25857127 | 7.68363098 | 52.8162268 | 2.12725674 | 0.25857127 | 7.68363098 | 52.8162268 |
| Oas1b   | 1.69051892 | 5.34363105 | 1.89618624 | 1.95412307 | 1.69051892 | 5.34363105 | 1.89618624 | 1.95412307 |
| Osmr    | 1.05641706 | 1.2265442  | 1.22906112 | 1.42064422 | 1.05641706 | 1.2265442  | 1.22906112 | 1.42064422 |
| Osmr1   | 1.69939369 | 4.8308504  | 0.52637079 | 0.57948826 | 1.69939369 | 4.8308504  | 0.52637079 | 0.57948826 |
| Cif2    | 0.8153683  | 0.8982971  | 1.0725435  | 1.21659451 | 0.8153683  | 0.8982971  | 1.0725435  | 1.21659451 |

**IRF3/-**

| Genes | v200 |       |       |         | v3000 |       |       |  |
|-------|------|-------|-------|---------|-------|-------|-------|--|
|       | v200 | v1000 | v2000 | poly IC | v200  | v1000 | v3000 |  |
