# Supplementary material
Source: PubMed Central journal article supplement (PMC2885285)

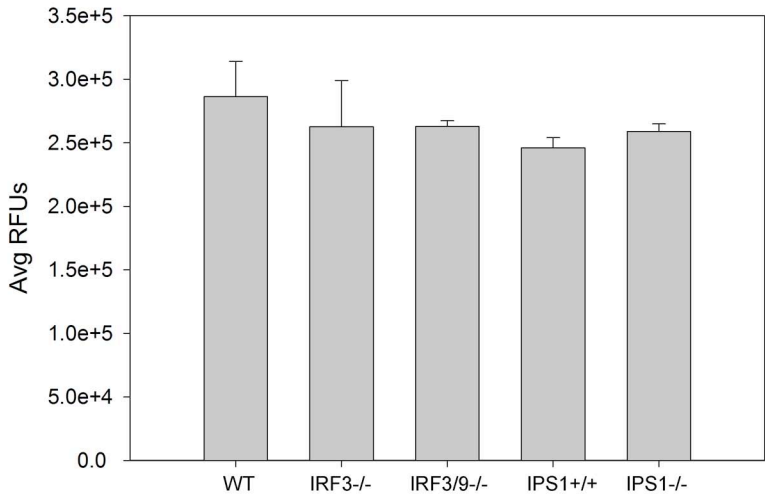

Supplement: NIHMS191633-supplement-Suppl__Fig__1_.pdf [file NIHMS191633-supplement-Suppl__Fig__1_.pdf]

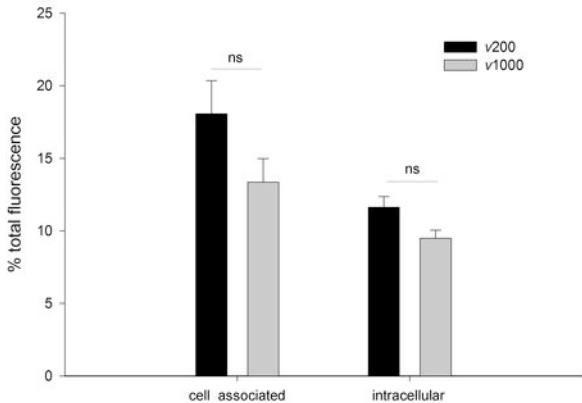

Supplement: NIHMS191633-supplement-Suppl__Fig__2_.pdf [file NIHMS191633-supplement-Suppl__Fig__2_.pdf]

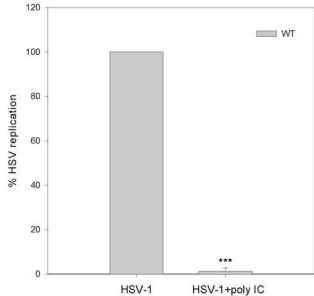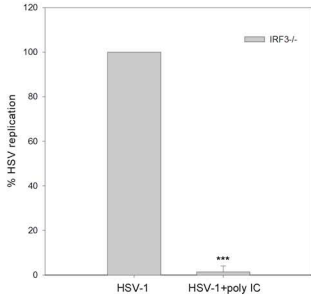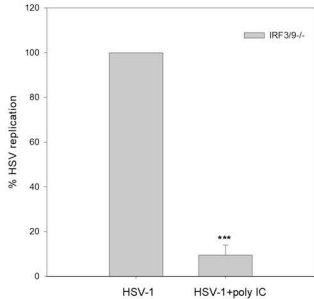

Supplement: NIHMS191633-supplement-Suppl__Fig__4.pdf [file NIHMS191633-supplement-Suppl__Fig__4.pdf]
